# Supplementary material for: Genomic and immune characteristics of HER2‐mutated non‐small‐cell lung cancer and response to immune checkpoint inhibitor‐based therapy
Source: PubMed Central journal article supplement (PMC10399722; doi:10.1002/1878-0261.13439), 2023-04-29

A

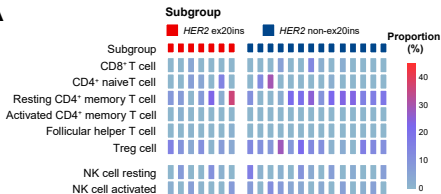

B

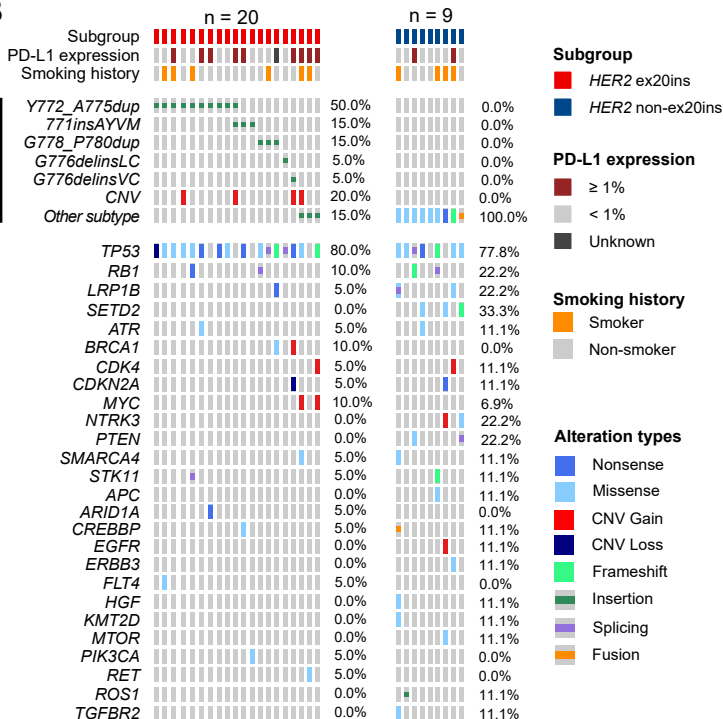

Supplement: MOL2-17-1581-s001.pdf [file MOL2-17-1581-s001.pdf]
